# Supplementary material for: Metabolic Tolerance to Atmospheric Pressure of Two Freshwater Endemic Amphipods Mostly Inhabiting the Deep-Water Zone of the Ancient Lake Baikal
Source: MDPI journal article supplement (doi:10.3390/insects13070578), 2022-06-24

**Figure S1.** Raw data by depths of sampling. Bars indicate medians and dots show individual measurements.  $r$  — Pearson’s coefficient describing correlation between the biochemical parameters right after sampling and the depths of amphipod collection.

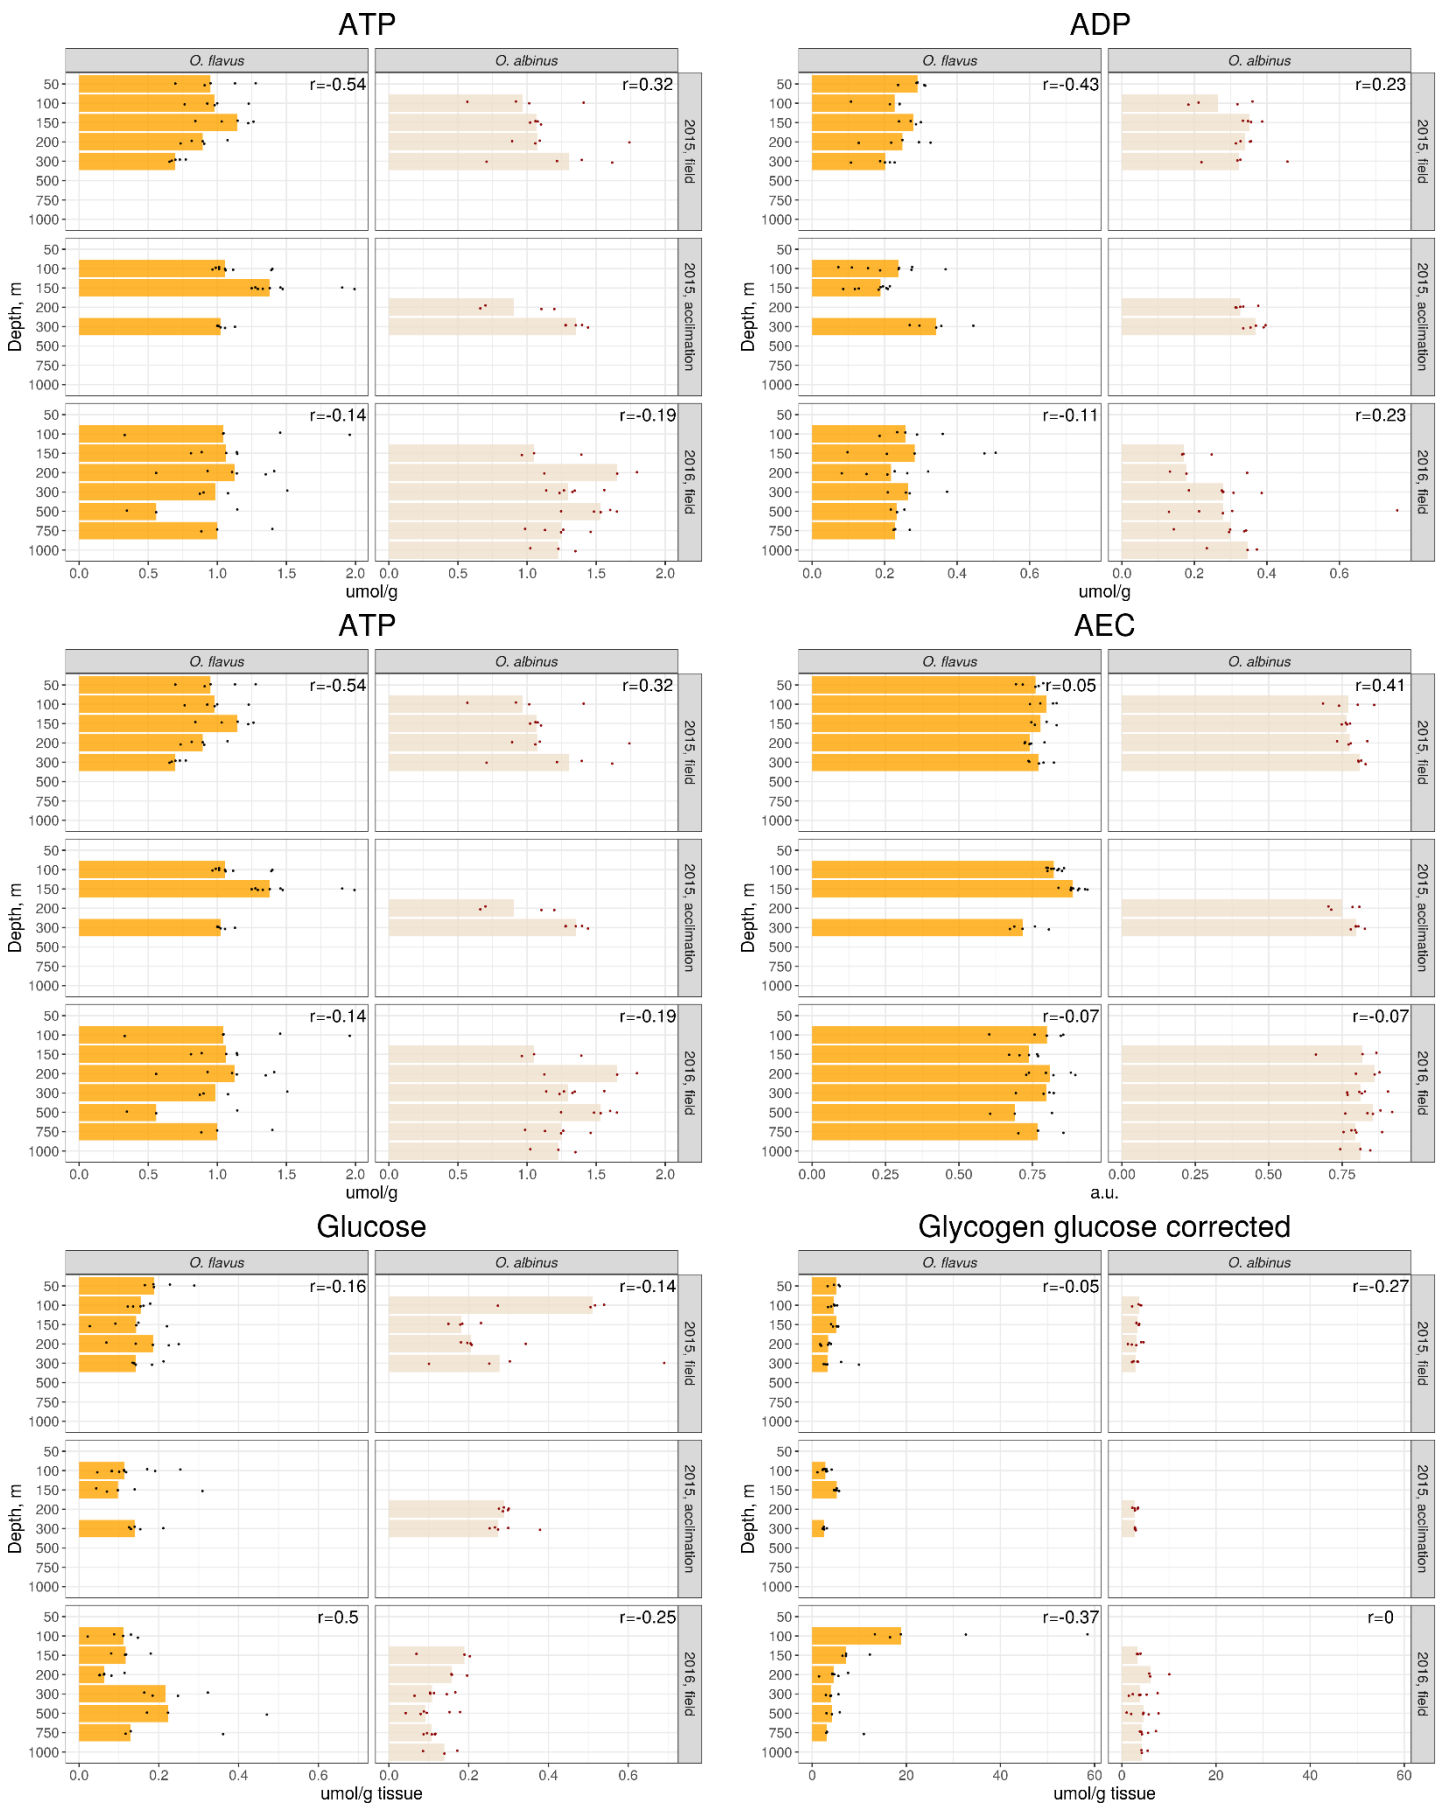

### Neutral lipids, diene conjugates

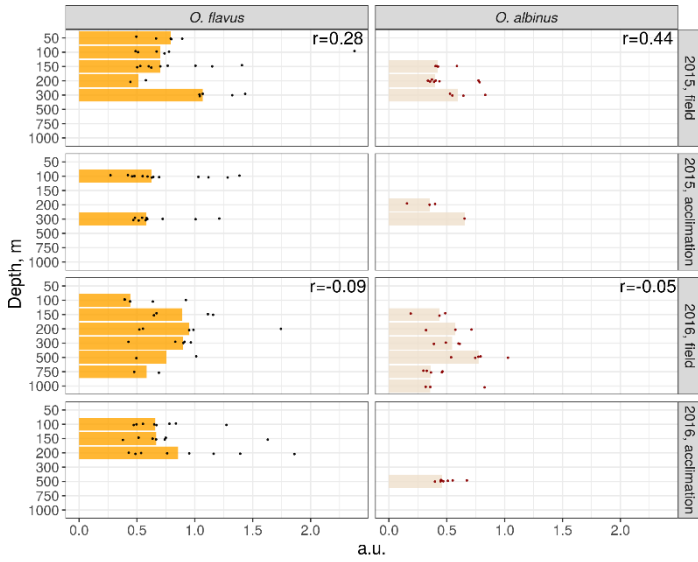

### Neutral lipids, triene conjugates

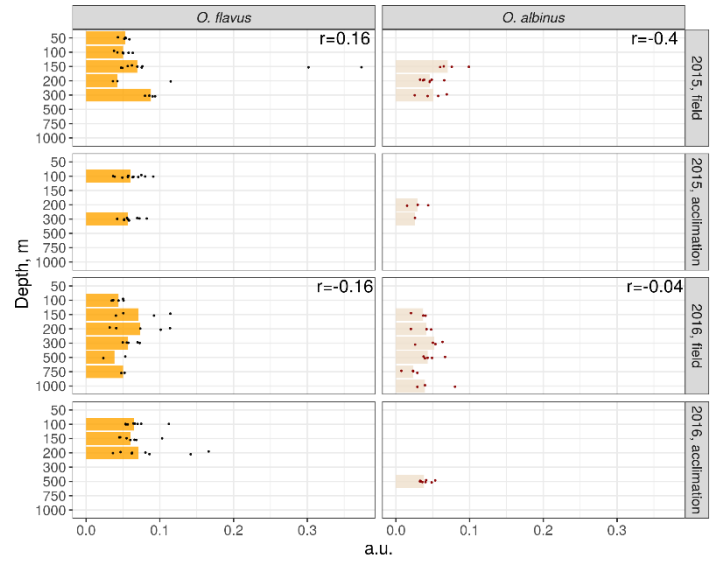

### Neutral lipids, Schiff bases

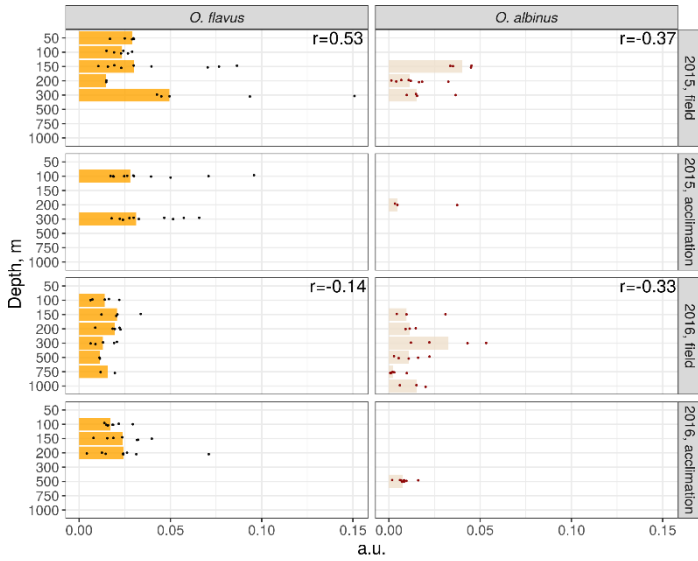

### Phospholipids, diene conjugates

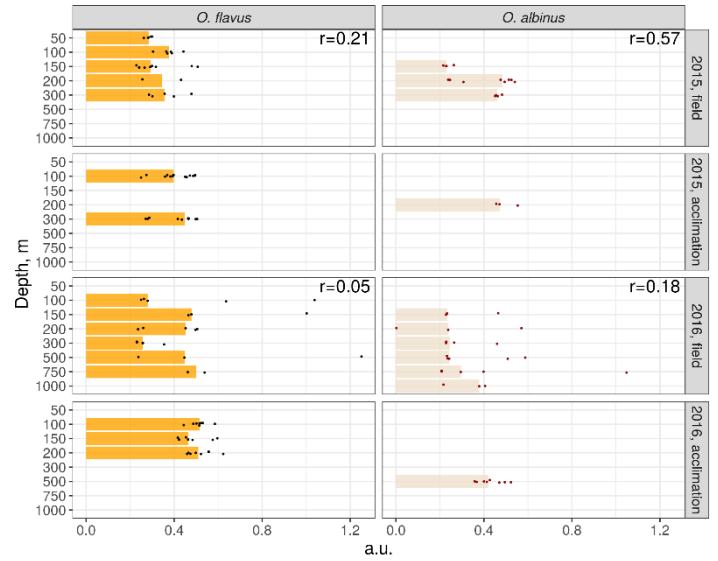

### Phospholipids, triene conjugates

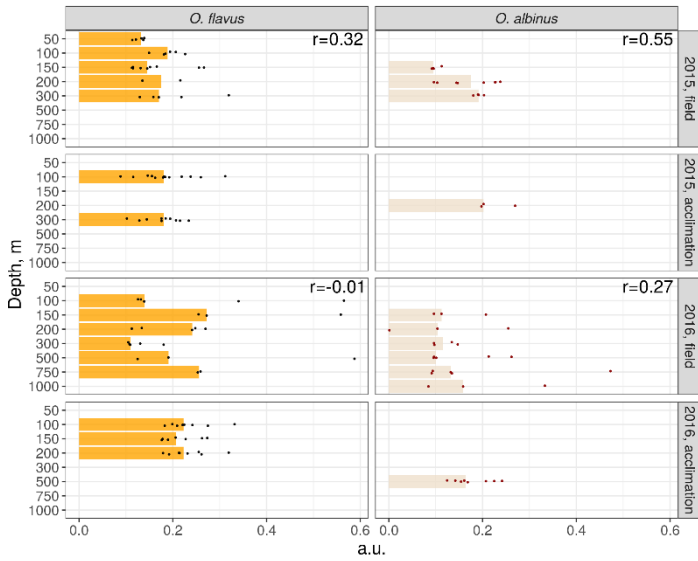

### Phospholipids, Schiff bases

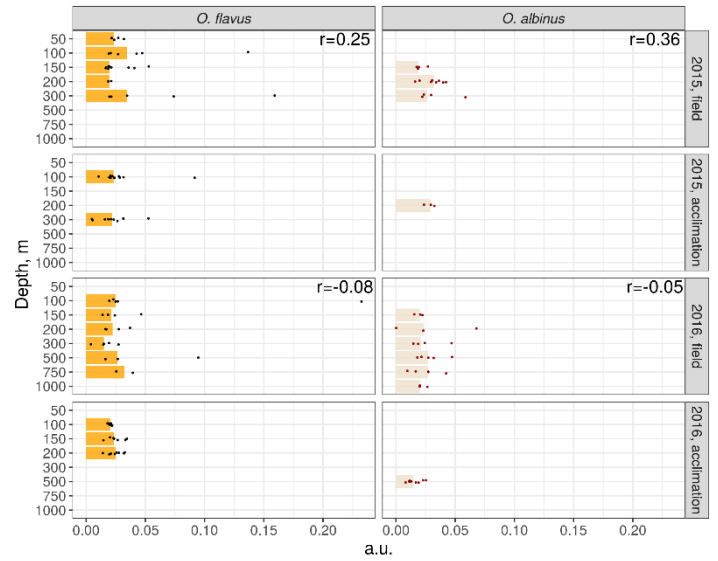

## CAT

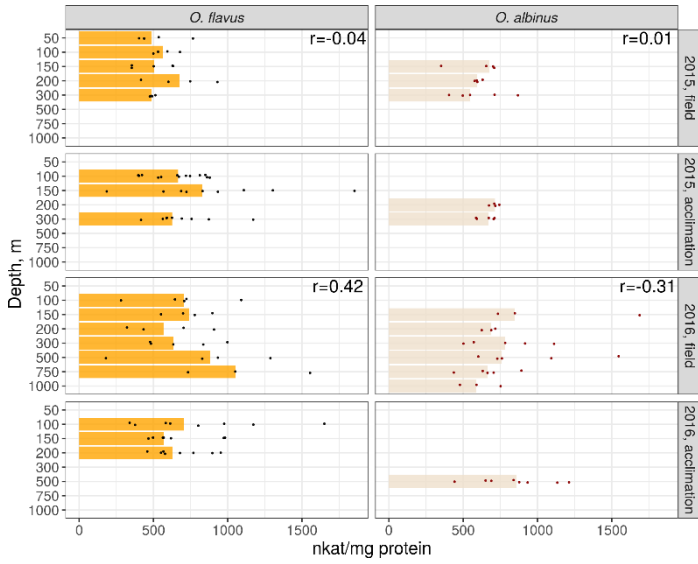

## GST

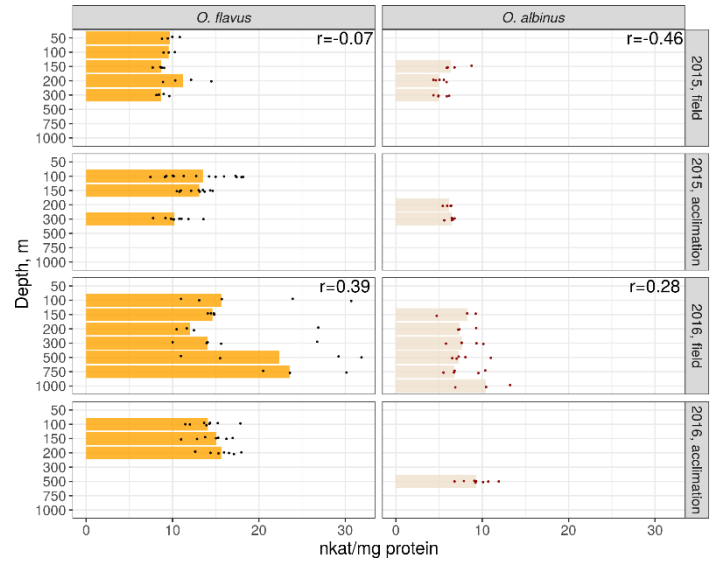

## POD

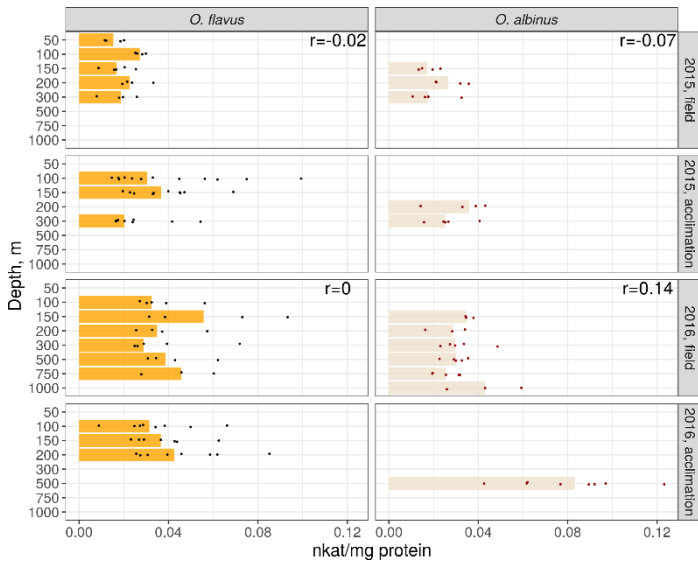

## LDH

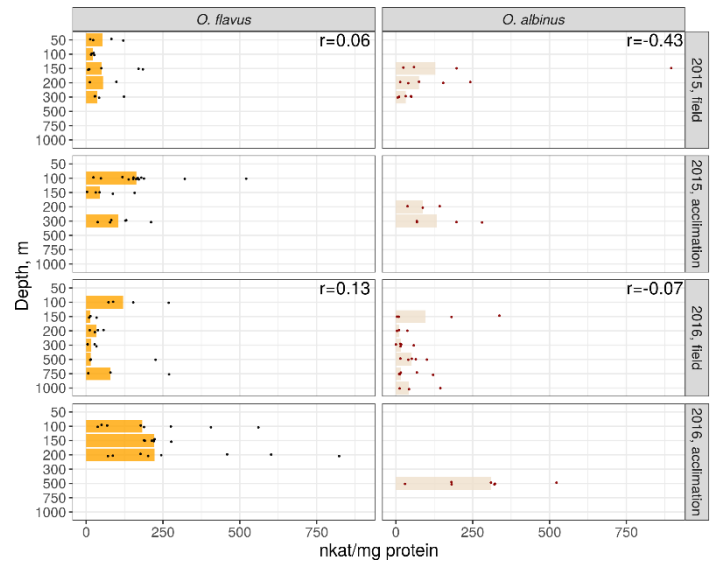

**Figure S2.** Energy-related biochemical parameters in *O. flavus* and *O. albinus* fixed right after collection from deep-water traps in the range 100-300 m. Values are expressed as  $\mu\text{mol g}^{-1}$  of tissue for adenylates, glucose and glycogen (glucose-corrected) reserves and as  $\text{nkat mg}^{-1}$  for LDH activity. The numbers near the brackets indicate p-values for respective pairwise comparisons if the difference is statistically significant (Mann-Whitney U-test with Holm's correction for multiple comparisons).

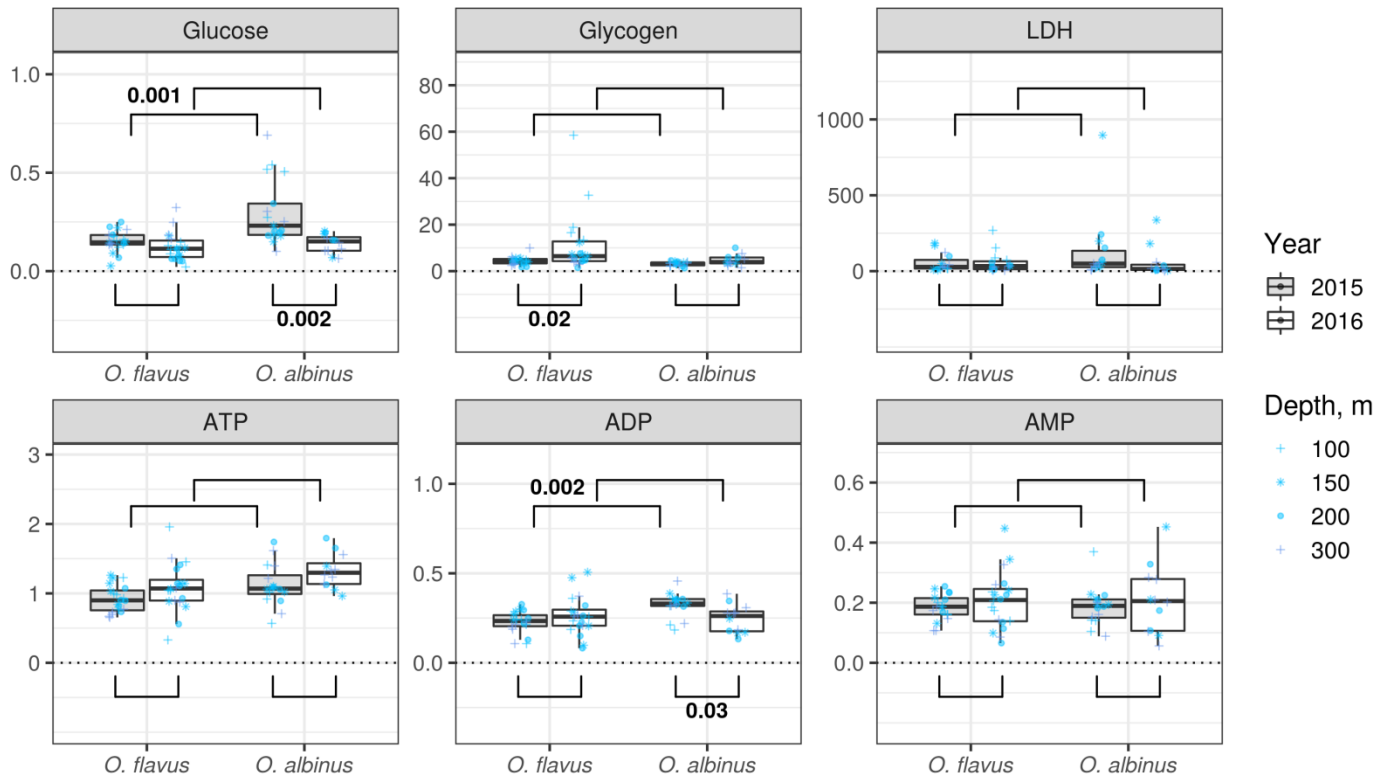

**Figure S3.** Biochemical parameters related to oxidative status in *O. flavus* and *O. albinus* fixed right after collection from deep-water traps in the range 100-300 m. Values are expressed as nkat mg<sup>-1</sup> of protein for the enzyme activities (CAT, GST, POD) and in a.u. for lipid peroxidation products (DC, TC and SB). The numbers near the brackets indicate p-values for respective pairwise comparisons if the difference is statistically significant (Mann-Whitney U-test with Holm's correction for multiple comparisons).

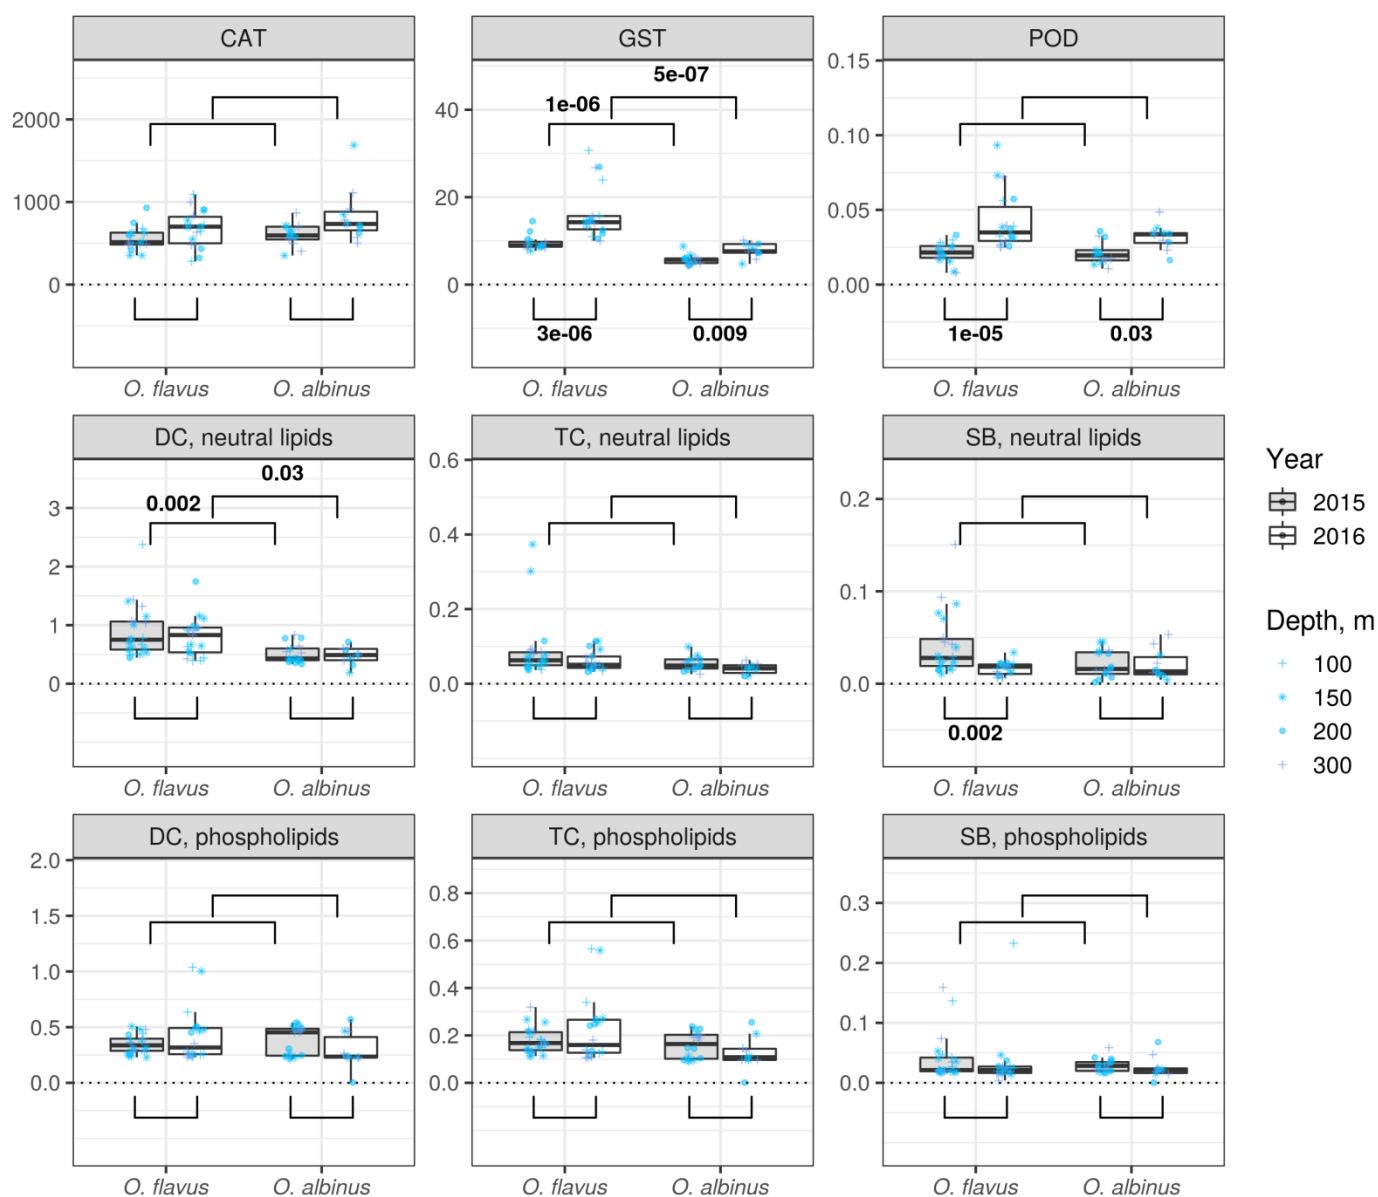

Supplement: s1 [file s1]
